# Supplementary material for: ChAdOx1 nCoV-19 (AZD1222) protects Syrian hamsters against SARS-CoV-2 B.1.351 and B.1.1.7
Source: PubMed Central journal article supplement (PMC8497486; doi:10.1038/s41467-021-26178-y), 2021-10-07
Supplement: 41467_2021_26178_MOESM1_ESM.pdf [file 41467_2021_26178_MOESM1_ESM.pdf]

Table S1. Primers and probes used. NA = not applicable.

| Primer name          | Sequence                   | Catalogue number<br>IDT |
|----------------------|----------------------------|-------------------------|
| E Sarbeco_F1 Forward | ACAGGTACGTTAATAGTTAATAGCGT | 10006889                |
| E Sarbeco_R2 Reverse | ATATTGCAGCAGTACGCACACA     | 10006891                |
| E Sarbeco_P1 Probe   | ACACTAGCCATCCTTACTGCGCTTCG | 10006893                |
| sgLeadSARSCoV2-F     | CGATCTCTTGTAGATCTGTTCTC    | NA                      |
